# Supplementary material
Source: Springer Nature journal article supplement (https://www.springermedizin.de/resource/supplementary/13063_2012_1141_MOESM2_ESM.pdf/9619384)
Supplement: MOESM2 [file 9619384]

Randomisation by midwife

Control midwives

Intervention midwives

1371 women screened by midwife  
(11 per midwife per month, over 8 months)

1371 women screened by midwife  
(11 per midwife per month, over 8 months)

Screen positive: n=110<sup>A</sup>

Screen positive: n=110<sup>A</sup>

Meet inclusion criteria: n=77<sup>B</sup>

Meet inclusion criteria: n=77<sup>B</sup>

Consent to study; receive usual care from  
midwife: n=60<sup>C</sup>

Consent to study; receive structured advice  
from midwife & brief intervention from  
alcohol counsellor: n=60<sup>C</sup>

Attrition 33%<sup>D</sup>

Attrition 33%<sup>D</sup>

Followed to 3<sup>rd</sup> trimester n=40

Followed to 3<sup>rd</sup> trimester n=40

Attrition 25%<sup>E</sup>

Attrition 25%<sup>E</sup>

Followed to 6 months post partum n=30

Followed to 6 months postpartum n=30
